# Supplementary material for: Clinical Evidence of Chemotherapy or Endocrine Therapy Maintenance in Patients with Metastatic Breast Cancer: Meta-Analysis of Randomized Clinical Trials and Propensity Score Matching of Multicenter Cohort Study
Source: PubMed Central journal article supplement — Cancer Res Treat. 2022 Feb 4;54(4):1038–52. doi: 10.4143/crt.2021.698 (PMC9582473; doi:10.4143/crt.2021.698), 2022-02-04
Supplement: crt-2021-698_S1_Fig.pdf [file crt-2021-698_S1_Fig.pdf]

A

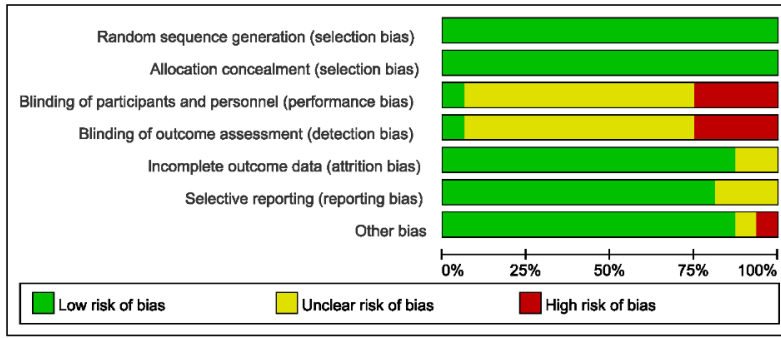

B

|               | Random sequence generation (selection bias) | Allocation concealment (selection bias) | Blinding of participants and personnel (performance bias) | Blinding of outcome assessment (detection bias) | Incomplete outcome data (attrition bias) | Selective reporting (reporting bias) | Other bias |
|---------------|---------------------------------------------|-----------------------------------------|-----------------------------------------------------------|-------------------------------------------------|------------------------------------------|--------------------------------------|------------|
| Alba2010      | +                                           | +                                       | ?                                                         | ?                                               | +                                        | +                                    | +          |
| Coates1987    | +                                           | +                                       | ?                                                         | ?                                               | +                                        | ?                                    | +          |
| EFGS2000      | +                                           | +                                       | ?                                                         | ?                                               | +                                        | +                                    | +          |
| Ejlertsen1993 | +                                           | +                                       | ?                                                         | ?                                               | +                                        | +                                    | +          |
| Falkson1998   | +                                           | +                                       | ?                                                         | ?                                               | +                                        | +                                    | +          |
| Gennari2006   | +                                           | +                                       | ?                                                         | ?                                               | +                                        | ?                                    | +          |
| Gligorov2014  | +                                           | +                                       | -                                                         | -                                               | +                                        | +                                    | +          |
| Gregory1997   | +                                           | +                                       | -                                                         | -                                               | +                                        | ?                                    | +          |
| Harris1990    | +                                           | +                                       | ?                                                         | ?                                               | +                                        | +                                    | +          |
| Huang2016     | +                                           | +                                       | +                                                         | +                                               | ?                                        | +                                    | -          |
| Kloke1999     | +                                           | +                                       | -                                                         | -                                               | +                                        | +                                    | +          |
| Mayordomo2009 | +                                           | +                                       | ?                                                         | ?                                               | ?                                        | +                                    | ?          |
| Muss1991      | +                                           | +                                       | ?                                                         | ?                                               | +                                        | +                                    | +          |
| Nooij2003     | +                                           | +                                       | ?                                                         | ?                                               | +                                        | +                                    | +          |
| Park2013      | +                                           | +                                       | ?                                                         | ?                                               | +                                        | +                                    | +          |
| Tredan2016    | +                                           | +                                       | -                                                         | -                                               | +                                        | +                                    | +          |

S1 Fig. Risk of bias graph and summary [1-14].
