# Supplementary material for: Clinical Evidence of Chemotherapy or Endocrine Therapy Maintenance in Patients with Metastatic Breast Cancer: Meta-Analysis of Randomized Clinical Trials and Propensity Score Matching of Multicenter Cohort Study
Source: PubMed Central journal article supplement — Cancer Res Treat. 2022 Feb 4;54(4):1038–52. doi: 10.4143/crt.2021.698 (PMC9582473; doi:10.4143/crt.2021.698), 2022-02-04
Supplement: crt-2021-698_S3_Table.pdf [file crt-2021-698_S3_Table.pdf]

**S3 Table.** Pooled hazard ratios for subgroup analysis on overall survival compared chemotherapy maintenance and observation

| Subgroup                         | No. of trials | No. of patients | Hazard ratio (95% CI) | p-value | I <sup>2</sup> (%) | GRADE                 |
|----------------------------------|---------------|-----------------|-----------------------|---------|--------------------|-----------------------|
| Time of random assignment        |               |                 |                       |         |                    |                       |
| Before first-line chemotherapy   | 4             | 1,195           | 0.85 (0.76-0.96)      | 0.009   | 0.0                | ⊕⊕⊕⊕                  |
| After a fixed No. of cycles      | 9             | 1,465           | 0.88 (0.73-1.05)      | 0.141   | 47.4               | ⊕⊕⊕O <sup>a)</sup>    |
| Duration time                    |               |                 |                       |         |                    |                       |
| Until PD                         | 8             | 1,487           | 0.83 (0.70-0.99)      | 0.034   | 49.9               | ⊕⊕⊕⊕                  |
| Additional a fixed No. of cycles | 5             | 1,173           | 0.91 (0.79-1.04)      | 0.151   | 7.9                | ⊕⊕⊕O <sup>a)</sup>    |
| Regimen of duration              |               |                 |                       |         |                    |                       |
| Combination agent therapy        | 8             | 1,482           | 0.88 (0.79-0.98)      | 0.023   | 18.9               | ⊕⊕⊕⊕                  |
| Single-agent therapy             | 5             | 778             | 0.84 (0.62-1.15)      | 0.274   | 59.6               | ⊕⊕OO <sup>a),b)</sup> |
| Switch agent therapy             |               |                 |                       |         |                    |                       |
| No                               | 8             | 1,362           | 0.87 (0.79-0.97)      | 0.011   | 9.1                | ⊕⊕⊕⊕                  |
| Yes                              | 5             | 898             | 0.86 (0.64-1.16)      | 0.329   | 63.4               | ⊕⊕OO <sup>a),b)</sup> |

CI, confidence interval. GRADE Working Group grades of evidence: ⊕⊕⊕⊕ High quality: Further research is very unlikely to change our confidence in the estimated effect; ⊕⊕⊕O Moderate quality: Further research is likely to have an important impact on our confidence in the estimated effect and may change the estimate; ⊕⊕OO Low quality: Further research is very likely to have an important impact on our confidence in the estimated effect and may change the estimate; ⊕OOO Very low quality: We are very uncertain about the estimate, <sup>a)</sup>Downgraded (-1) for risk of bias: all trials were judged as lack of blinding of participants and lack of outcome assessor blinding, some trials were judged unclear risk of bias as selective outcome reporting or selection bias, one trials judged high risk of bias as a result of insufficient randomized sequence was generated, indicating potential publication bias, <sup>b)</sup>Downgraded (-1) for imprecision: Small sample or small number of trials bias may exist.
