# Supplementary material for: Clinical Evidence of Chemotherapy or Endocrine Therapy Maintenance in Patients with Metastatic Breast Cancer: Meta-Analysis of Randomized Clinical Trials and Propensity Score Matching of Multicenter Cohort Study
Source: PubMed Central journal article supplement — Cancer Res Treat. 2022 Feb 4;54(4):1038–52. doi: 10.4143/crt.2021.698 (PMC9582473; doi:10.4143/crt.2021.698), 2022-02-04
Supplement: crt-2021-698_S4_Fig.pdf [file crt-2021-698_S4_Fig.pdf]

A. Progression-free survival of individual trials

| Study       | Chemotherapy (total) | Endocrine therapy (total) | HR   | 95%CI        |
|-------------|----------------------|---------------------------|------|--------------|
| Tredan 2016 | 59                   | 58                        | 1.00 | (0.70; 1.50) |

Test for overall effect:  $z=0.000$  ( $p=0.998$ )

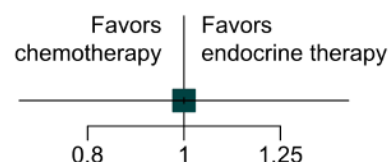

B. Progression-free survival of pooled trials (Network)

| Study   | Chemotherapy (total) | Endocrine therapy (total) | HR   | 95%CI        |
|---------|----------------------|---------------------------|------|--------------|
| Network | 1456                 | 104                       | 1.00 | (0.73; 1.37) |

Test for overall effect:  $z=0.000$  ( $p=1.000$ )

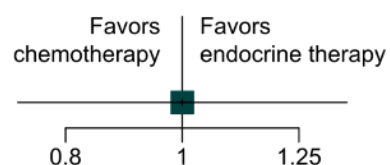

C. Overall survival of individual trials

| Study       | Chemotherapy (total) | Endocrine therapy (total) | HR   | 95%CI        |
|-------------|----------------------|---------------------------|------|--------------|
| Tredan 2016 | 59                   | 58                        | 1.15 | (0.59; 2.22) |

Test for overall effect:  $z=0.410$  ( $p=0.679$ )

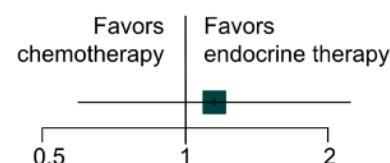

D. Overall survival of pooled trials (Network)

| Study   | Chemotherapy (total) | Endocrine therapy (total) | HR   | 95%CI        |
|---------|----------------------|---------------------------|------|--------------|
| Network | 1456                 | 104                       | 1.02 | (0.68; 1.53) |

Test for overall effect:  $z=0.10$  ( $p=0.920$ )

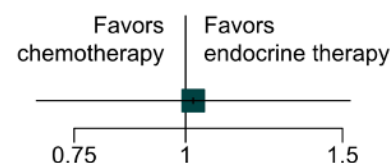

**S4 Fig.** Pooled hazard ratios for progression-free survival and overall survival with chemotherapy versus endocrine therapy maintenance [5]. CI, confidence interval; HR, hazard ratio.
