# Supplementary material for: Clinical Evidence of Chemotherapy or Endocrine Therapy Maintenance in Patients with Metastatic Breast Cancer: Meta-Analysis of Randomized Clinical Trials and Propensity Score Matching of Multicenter Cohort Study
Source: PubMed Central journal article supplement — Cancer Res Treat. 2022 Feb 4;54(4):1038–52. doi: 10.4143/crt.2021.698 (PMC9582473; doi:10.4143/crt.2021.698), 2022-02-04
Supplement: crt-2021-698_S8_Fig.pdf [file crt-2021-698_S8_Fig.pdf]

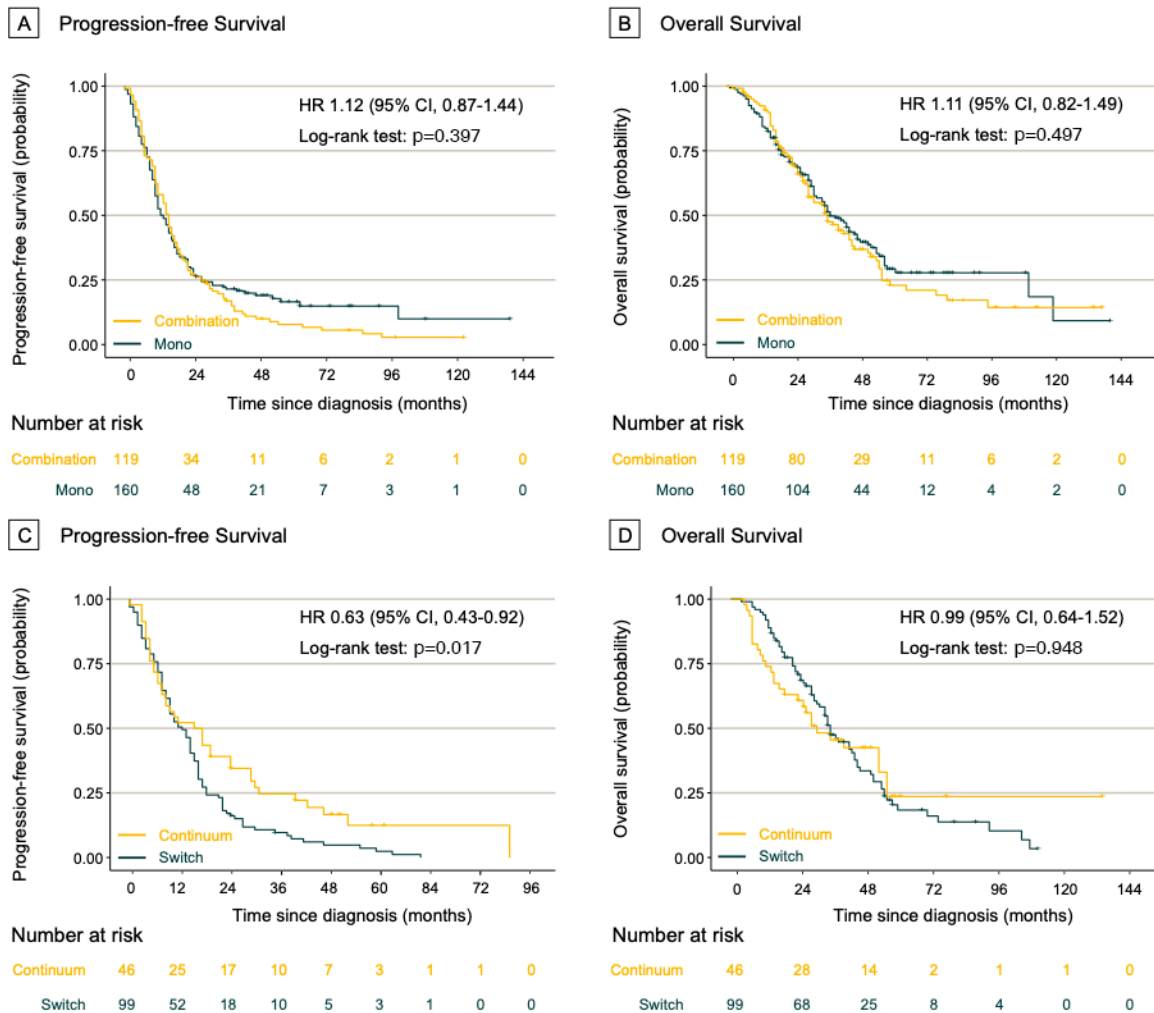

**S8 Fig.** Progression-free survival and overall survival analysis among patients with monotherapy versus combination endocrine therapy maintenance and switch versus continuum endocrine therapy maintenance in multicenter cohort. Progression-free survival (A) and overall survival (B) analysis in patients with monotherapy or combination maintenance therapy of endocrine therapy. Progression-free survival (C) and overall survival (D) analysis in patients with switch or continuum maintenance therapy of endocrine therapy. CI, confidence interval; HR, hazard ratio.
