# Supplementary material for: Clinical Evidence of Chemotherapy or Endocrine Therapy Maintenance in Patients with Metastatic Breast Cancer: Meta-Analysis of Randomized Clinical Trials and Propensity Score Matching of Multicenter Cohort Study
Source: PubMed Central journal article supplement — Cancer Res Treat. 2022 Feb 4;54(4):1038–52. doi: 10.4143/crt.2021.698 (PMC9582473; doi:10.4143/crt.2021.698), 2022-02-04
Supplement: crt-2021-698_S10_Fig.pdf [file crt-2021-698_S10_Fig.pdf]

Distribution

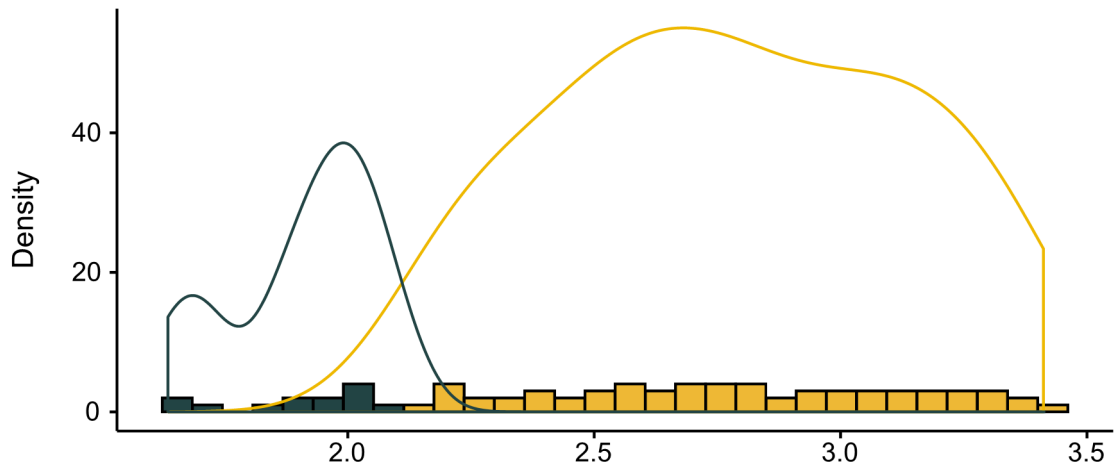

Maximally selected rank statistics

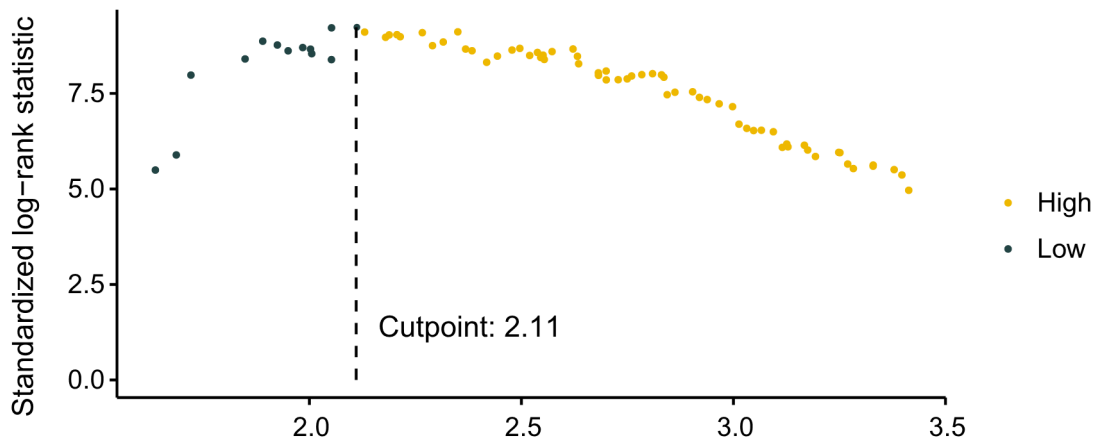

**S10 Fig.** The optimal cutoff value of risk scores of deaths from the prediction model.
