# Supplementary material for: Clinical Evidence of Chemotherapy or Endocrine Therapy Maintenance in Patients with Metastatic Breast Cancer: Meta-Analysis of Randomized Clinical Trials and Propensity Score Matching of Multicenter Cohort Study
Source: PubMed Central journal article supplement — Cancer Res Treat. 2022 Feb 4;54(4):1038–52. doi: 10.4143/crt.2021.698 (PMC9582473; doi:10.4143/crt.2021.698), 2022-02-04
Supplement: crt-2021-698_S11_Fig.pdf [file crt-2021-698_S11_Fig.pdf]

A

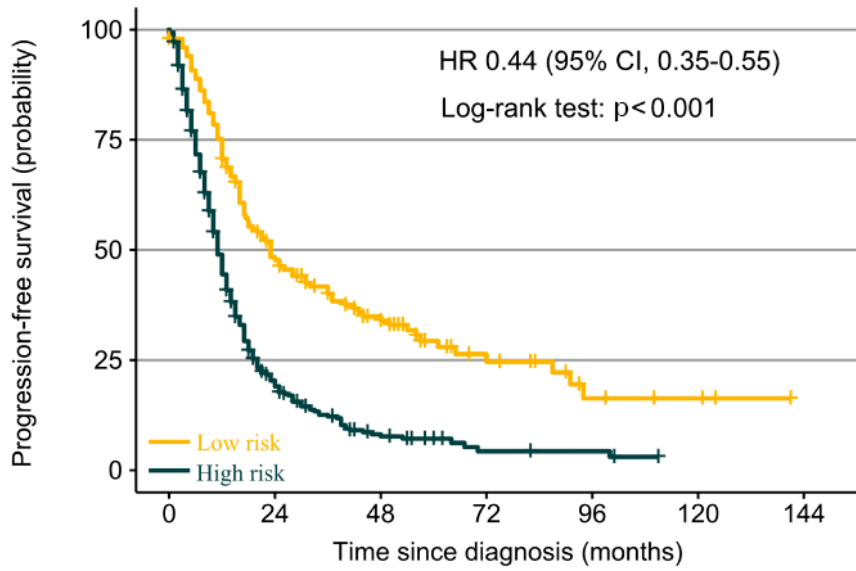

Number at risk

|           |     |    |    |    |   |   |   |
|-----------|-----|----|----|----|---|---|---|
| Low risk  | 155 | 68 | 37 | 15 | 5 | 3 | 0 |
| High risk | 358 | 59 | 16 | 4  | 3 | 0 | 0 |

B

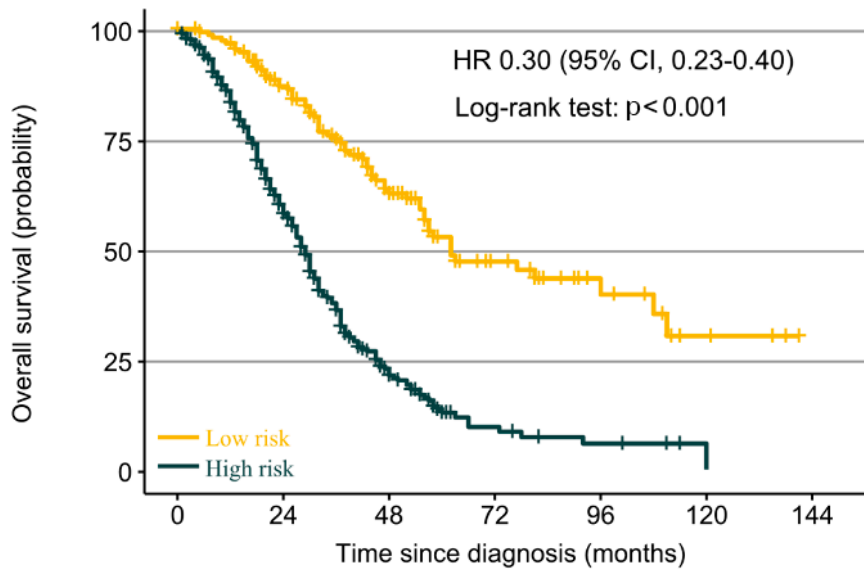

Number at risk

|           |     |     |    |    |    |   |   |
|-----------|-----|-----|----|----|----|---|---|
| Low risk  | 155 | 118 | 63 | 26 | 12 | 4 | 0 |
| High risk | 358 | 174 | 44 | 9  | 4  | 1 | 0 |

**S11 Fig.** Progression-free survival (A) and overall survival (B) analysis in patients stratified by prediction model. CI, confidence interval; HR, hazard ratio.
