# Supplementary material for: Clinical Evidence of Chemotherapy or Endocrine Therapy Maintenance in Patients with Metastatic Breast Cancer: Meta-Analysis of Randomized Clinical Trials and Propensity Score Matching of Multicenter Cohort Study
Source: PubMed Central journal article supplement — Cancer Res Treat. 2022 Feb 4;54(4):1038–52. doi: 10.4143/crt.2021.698 (PMC9582473; doi:10.4143/crt.2021.698), 2022-02-04
Supplement: crt-2021-698_S12_Fig.pdf [file crt-2021-698_S12_Fig.pdf]

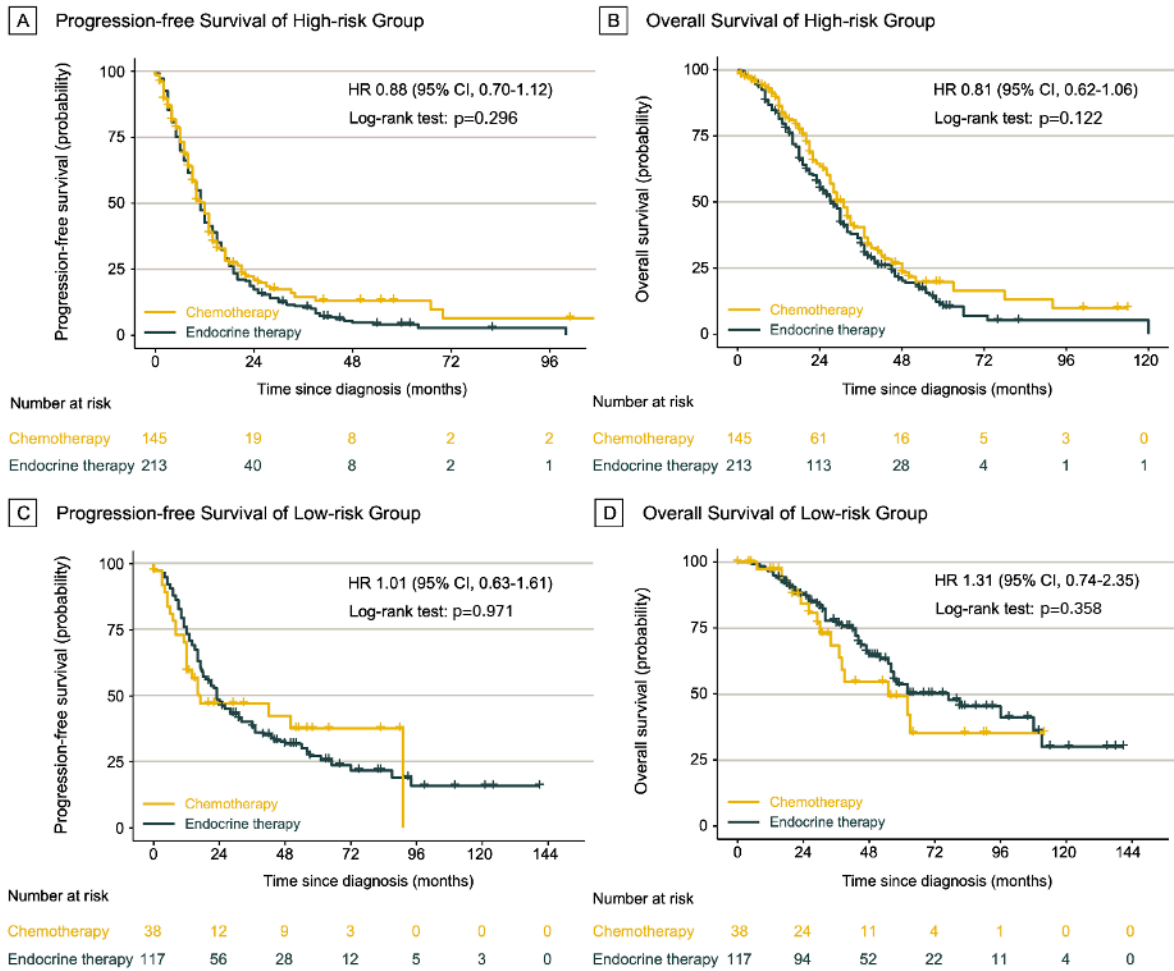

**S12 Fig.** Progression-free survival and overall survival among patients with chemotherapy versus endocrine therapy maintenance of high- or low-risk group in multicenter cohort: (A) progression-free survival of high-risk group (A) and low-risk group (C), (B) overall survival of high-risk group (B) and low-risk group (D). CI, confidence interval; HR, hazard ratio.
