# Supplementary material for: Clinical Evidence of Chemotherapy or Endocrine Therapy Maintenance in Patients with Metastatic Breast Cancer: Meta-Analysis of Randomized Clinical Trials and Propensity Score Matching of Multicenter Cohort Study
Source: PubMed Central journal article supplement — Cancer Res Treat. 2022 Feb 4;54(4):1038–52. doi: 10.4143/crt.2021.698 (PMC9582473; doi:10.4143/crt.2021.698), 2022-02-04
Supplement: crt-2021-698_S14_Fig.pdf [file crt-2021-698_S14_Fig.pdf]

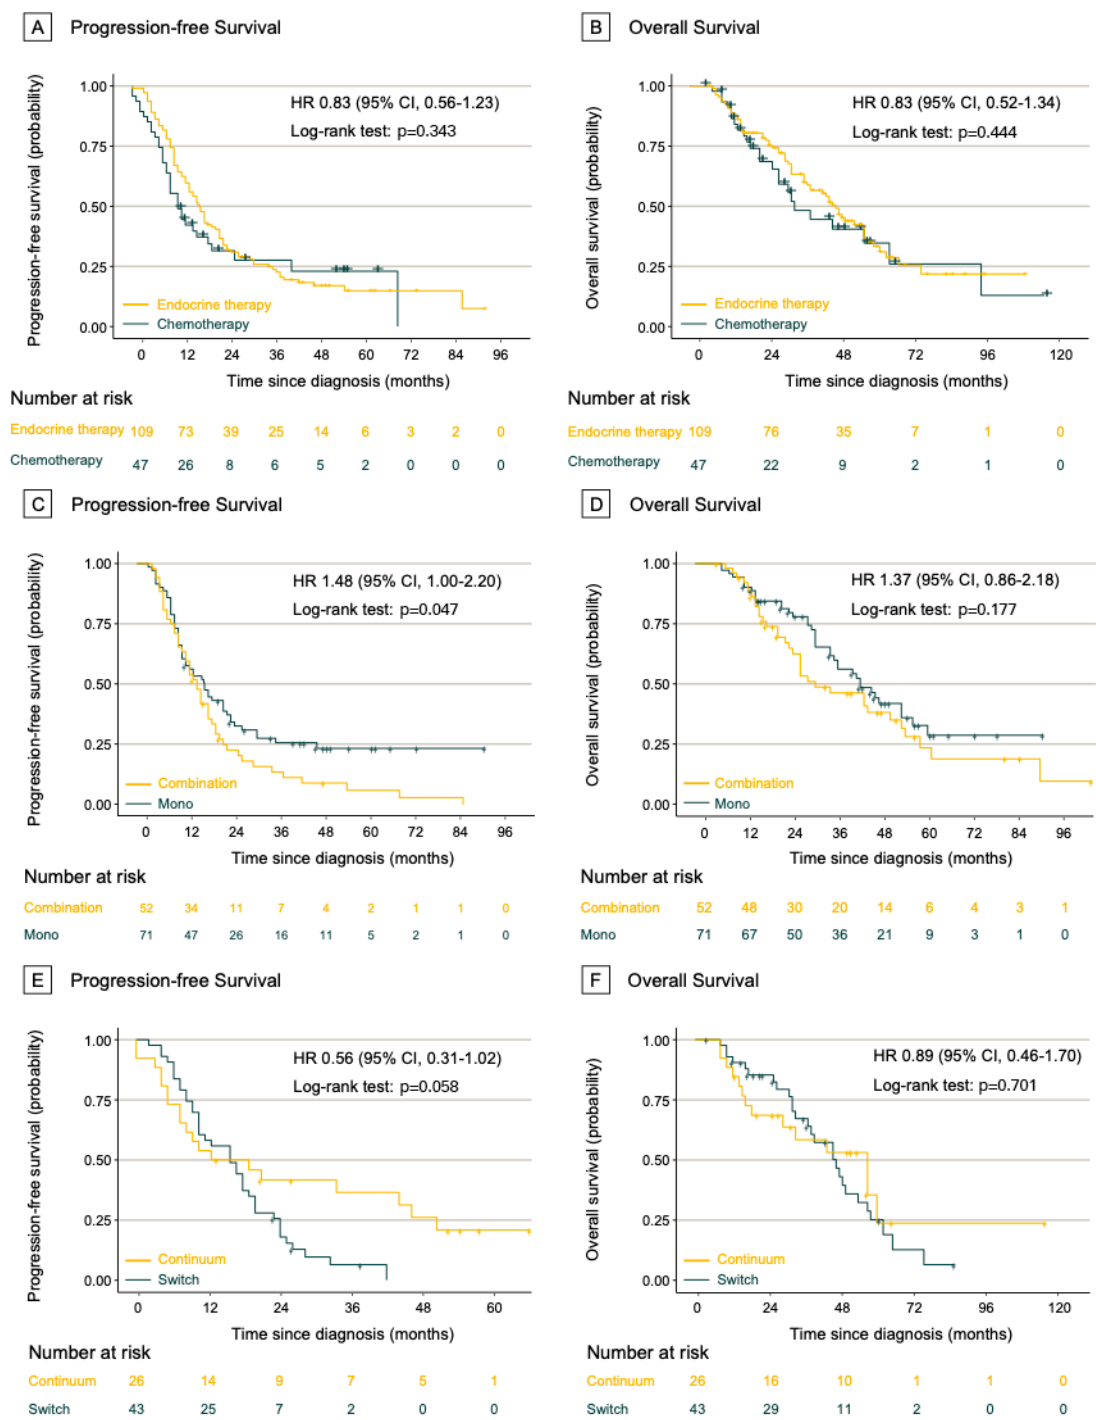

**S14 Fig.** Progression-free survival and overall survival among patients with partial response in multicenter cohort. Progression-free survival and overall survival analysis among partial response patients with chemotherapy versus endocrine maintenance therapy (A, B), monotherapy versus combination maintenance therapy (C, D), and switch versus continuum maintenance therapy (E, F). CI, confidence interval; HR, hazard ratio.
