# Supplementary material for: Clinical Evidence of Chemotherapy or Endocrine Therapy Maintenance in Patients with Metastatic Breast Cancer: Meta-Analysis of Randomized Clinical Trials and Propensity Score Matching of Multicenter Cohort Study
Source: PubMed Central journal article supplement — Cancer Res Treat. 2022 Feb 4;54(4):1038–52. doi: 10.4143/crt.2021.698 (PMC9582473; doi:10.4143/crt.2021.698), 2022-02-04
Supplement: crt-2021-698_S17_Fig.pdf [file crt-2021-698_S17_Fig.pdf]

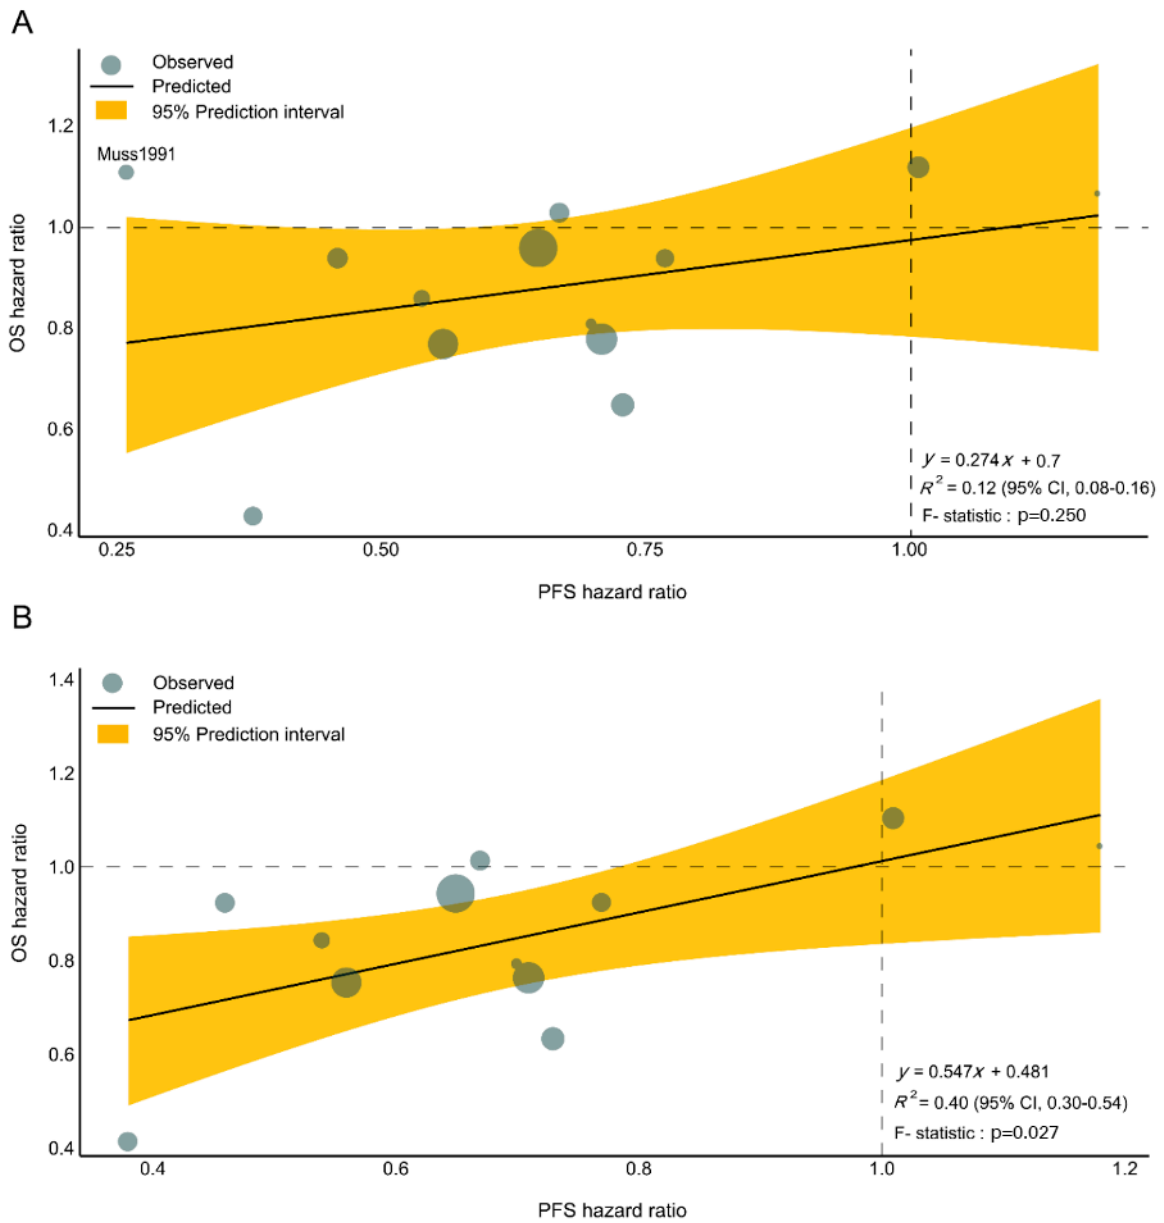

**S17 Fig.** Weighted linear correlation between overall survival and progression-free survival in trials of chemotherapy maintenance compared with observation. (A) The correlation was described in all trials. (B) The correlation was described in Trials after Muss 1991 Study eliminated. CI, confidence interval. OS, overall survival; PFS, progression-free survival.
